# Supplementary material for: A two-dose viral-vectored Plasmodium vivax multistage vaccine confers durable protection and transmission-blockade in a pre-clinical study
Source: Frontiers journal article supplement (doi:10.3389/fimmu.2024.1372584), 2024-04-30
Supplement: Table_1.pdf [file Table_1.pdf]

## Supplementary Material

### Supplementary Table S1

| ID | Parasitemia (%) | Gametocytemia (%) |
|----|-----------------|-------------------|
| 1  | 0.25            | 0.045             |
| 2  | 0.07            | 0.015             |
| 3  | 0.38            | 0.13              |
| 4  | 0.09            | 0.0072            |

**Table S1. *P. vivax* profile of patients from Brazil**

Parasitemia and gametocytemia are defined as the percentage of parasite-infected red blood cells and gametocyte-infected red blood cells within at least 10,000 observed red blood cells from Giemsa-stained peripheral blood smears, respectively.
